# Supplementary material for: Prognostic Factors for Mortality, Activity of Daily Living, and Quality of Life in Taiwanese Older Patients within 1 Year Following Hip Fracture Surgery
Source: MDPI journal article supplement (doi:10.3390/jpm12010102), 2022-01-13
Supplement: s1 [file s1]

## Supplementary Materials

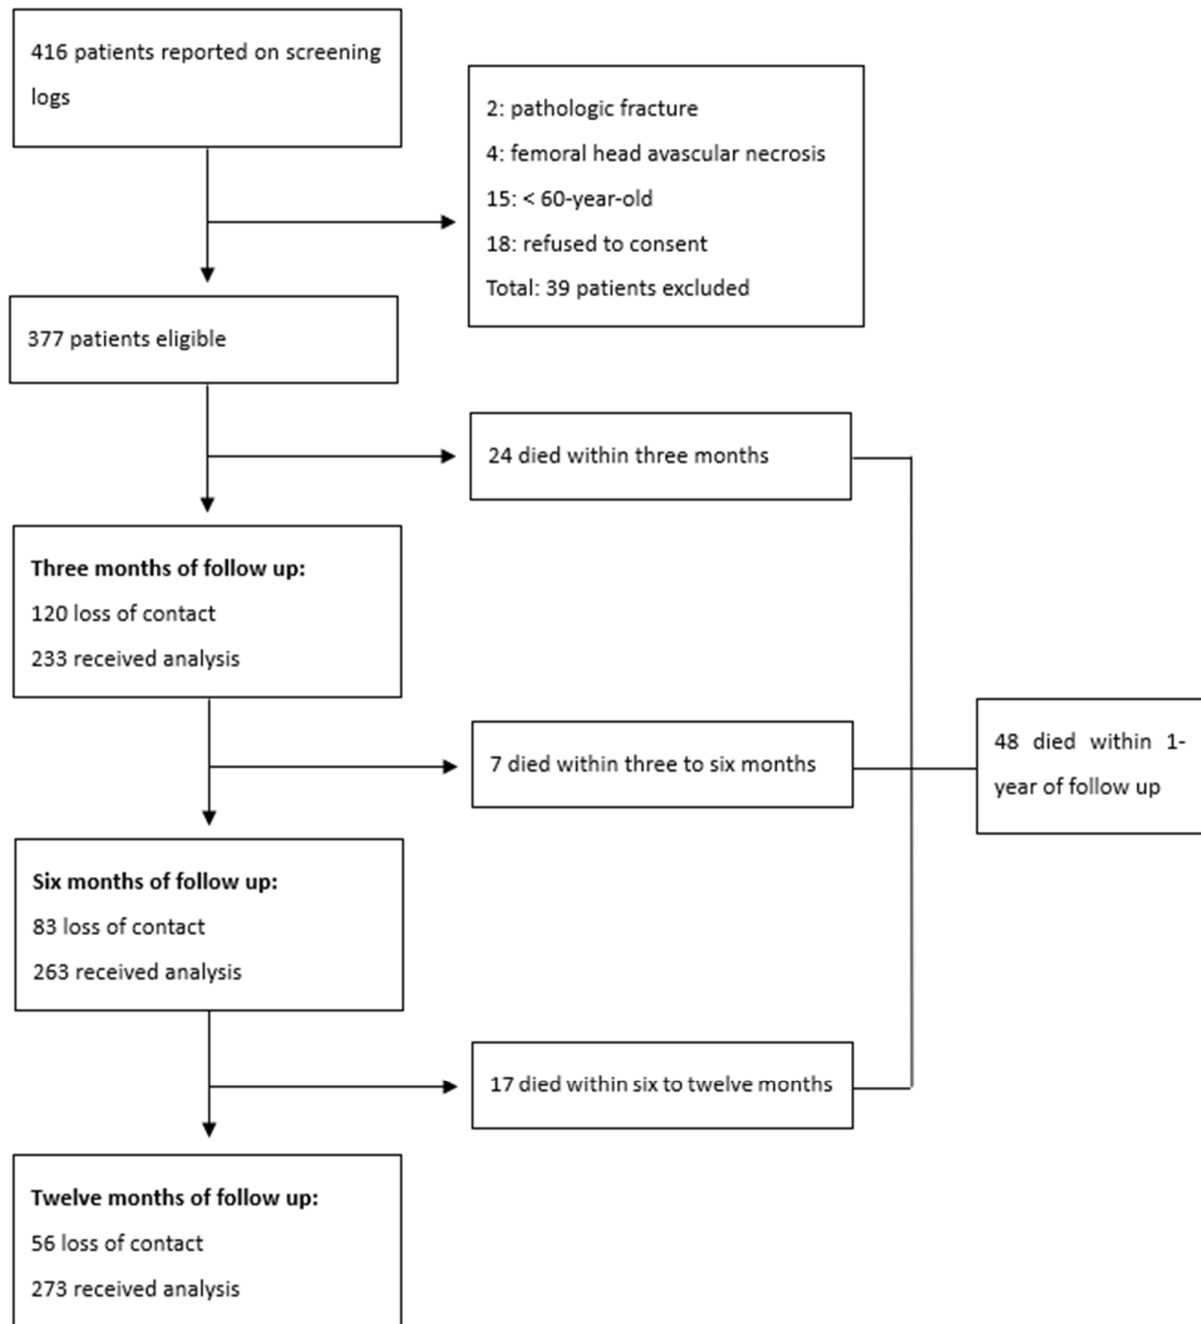

Figure S1. Study profile.

**Table S1:** Univariate analysis of potential clinical risk factors for postoperative 1-year mortality in older adults with hip fracture.

| Clinical Characteristics (n = 377)      | Survival Group (n = 329) | Mortality Group (n = 48) | p-value |
|-----------------------------------------|--------------------------|--------------------------|---------|
| <b>Age</b>                              | 80 ± 9.3                 | 87 ± 9.2                 | <0.001  |
| <b>Gender</b>                           |                          |                          |         |
| Male                                    | 88 (84%)                 | 17 (16%)                 | 0.2     |
| Female                                  | 241 (89%)                | 31 (11%)                 |         |
| <b>BMI</b>                              | 22 ± 3.6                 | 21 ± 3.9                 | 0.07    |
| <b>CCI</b>                              | 4.7 ± 1.6                | 6.0 ± 2.4                | <0.001  |
| <b>Types of fracture</b>                |                          |                          |         |
| FNF                                     | 182 (90%)                | 21 (10%)                 | 0.1     |
| PTF                                     | 147 (85%)                | 27 (15%)                 |         |
| <b>ASA grading</b>                      | 2.6 ± 0.5                | 3.0 ± 0.3                | <0.001  |
| <b>SPMSQ score</b>                      | 3.2 ± 3.6                | 5.8 ± 3.8                | <0.001  |
| <b>Handgrip strength (kg)</b>           | 13 ± 9.8                 | 8.0 ± 4.1                | <0.001  |
| <b>BMD T-score</b>                      | - 3.8 ± 1.2              | - 4.0 ± 0.83             | 0.17    |
| <b>Pre-operation laboratory data</b>    |                          |                          |         |
| Hb (g/dl)                               | 12 ± 2.2                 | 11 ± 2.4                 | 0.001   |
| Na (mmol/L)                             | 137 ± 4.1                | 137 ± 3.9                | 1.0     |
| Creatinine (ml/min/1.73m <sup>2</sup> ) | 1.1 ± 1.2                | 1.5 ± 1.6                | 0.07    |
| Vitamin D3 (ng/mL)                      | 20 ± 16                  | 20 ± 13                  | 0.9     |
| Parathyroid hormone (pg/mL)             | 55 ± 65                  | 59 ± 36                  | 0.7     |
| Albumin (g/dL)                          | 3.1 ± 0.4                | 3.0 ± 0.4                | 0.022   |
| <b>Surgical record</b>                  |                          |                          |         |
| Surgical delay (hour)                   | 76 ± 245                 | 89 ± 142                 | 0.7     |
| Operation time (min)                    | 80 ± 42                  | 70 ± 31                  | 0.1     |
| Blood loss (cc)                         | 113 ± 113                | 97 ± 73                  | 0.4     |
| <b>Surgical classification</b>          |                          |                          |         |
| ORIF                                    | 204 (86%)                | 32 (14%)                 | 0.5     |
| Joint replacement                       | 125 (89%)                | 16 (11%)                 |         |

Abbreviations: ASA, American Society of Anesthesiologists; BMD, bone mineral density; BMI, body mass index; CCI, Charlson Comorbidity Index; Hb, hemoglobin; ORIF, open reduction and internal fixation; SD, standard deviation; SPMSQ, Short Portable Mental Status Questionnaire.

**Table S2.** Univariate analysis of GEE model with multiple imputation: potential risk factors affecting postoperative EQ-5D in older adults with hip fracture.

| Variables                                               | $\beta$  | <i>p</i> -value | 95% CI Ratio |         |
|---------------------------------------------------------|----------|-----------------|--------------|---------|
|                                                         |          |                 | Lower        | Upper   |
| EQ-5D                                                   |          |                 |              |         |
| Postoperative 3 months v.s. preinjury status            | −0.12    | < 0.001         | −0.14        | − 0.10  |
| Postoperative 6 months v.s. preinjury status            | −0.08    | < 0.001         | − 0.11       | − 0.05  |
| Postoperative 12 months v.s. preinjury status           | − 0.08   | < 0.001         | − 0.11       | − 0.05  |
| Age                                                     | − 0.007  | < 0.001         | − 0.01       | − 0.005 |
| Gender (Female vs. Male)                                | − 0.002  | 0.92            | − 0.04       | 0.04    |
| BMI                                                     | 0.003    | 0.28            | −0.002       | 0.01    |
| CCI                                                     | − 0.034  | < 0.001         | − 0.04       | − 0.03  |
| BMD T-score                                             | 0.04     | < 0.001         | 0.03         | 0.06    |
| Pre-operation Hb (g/dl)                                 | 0.016    | < 0.001         | 0.007        | 0.02    |
| Creatinine (mg/dL)                                      | − 0.006  | 0.42            | − 0.02       | 0.008   |
| Na (mmol/L)                                             | 0.002    | 0.27            | − 0.002      | 0.007   |
| Vitamin D (ng/mL)                                       | 0.0002   | 0.82            | −0.001       | 0.001   |
| PTH                                                     | < −0.001 | 0.22            | − 0.001      | 0.0001  |
| Albumin (g/dL)                                          | 0.14     | < 0.001         | 0.09         | 0.19    |
| SPMSQ                                                   | −0.026   | < 0.001         | − 0.03       | − 0.02  |
| ASA grading                                             | − 0.12   | < 0.001         | − 0.15       | − 0.09  |
| Handgrip strength (kg)                                  | 0.007    | < 0.001         | 0.005        | 0.009   |
| Types of fracture (PTF vs. FNF)                         | −0.05    | 0.003           | − 0.09       | − 0.02  |
| Surgical delay (hour)                                   | < −0.001 | 0.94            | − 0.0001     | 0.0001  |
| Surgical classification<br>(Joint replacement vs. ORIF) | < 0.001  | 0.99            | − 0.04       | 0.04    |
| Time (min)                                              | < −0.001 | 0.97            | − 0.0004     | 0.0004  |
| Blood loss (cc)                                         | < −0.001 | 0.56            | − 0.0002     | 0.0001  |

Abbreviations: ASA, American Society of Anesthesiologists; BMD, bone mineral density; BMI, body mass index; CCI, Charlson Comorbidity Index; FNF, femoral neck fracture; Hb, hemoglobin; PTF, pertrochanteric fracture; ORIF, open reduction and internal fixation; SD, standard deviation.

**Table S3: Univariate analysis of the GEE model with multiple imputation: factors affecting postoperative BI in older adults with hip fracture.**

| Variables                                               | $\beta$ | <i>p</i> -value | 95% CI Ratio |        |
|---------------------------------------------------------|---------|-----------------|--------------|--------|
|                                                         |         |                 | Lower        | Upper  |
| BI                                                      |         |                 |              |        |
| Postoperative 3 months v.s. preinjury status            | - 16.5  | < 0.001         | - 18.7       | - 14.3 |
| Postoperative 6 months v.s. preinjury status            | - 13.9  | < 0.001         | - 16.6       | - 11.1 |
| Postoperative 12 months v.s. preinjury status           | - 14.3  | < 0.001         | -17.5        | - 11.2 |
| Age                                                     | - 0.7   | < 0.001         | - 0.98       | - 0.46 |
| Gender (Female vs. Male)                                | - 0.84  | 0.77            | - 6.5        | 4.8    |
| BMI                                                     | 0.57    | 0.10            | - 0.12       | 1.3    |
| CCI                                                     | - 4.5   | < 0.001         | - 5.9        | - 3.2  |
| BMD T-score                                             | 4.5     | < 0.001         | 2.3          | 6.8    |
| Pre-operation Hb (g/dl)                                 | 1.9     | 0.001           | 0.77         | 3.06   |
| Creatinine (mg/dL)                                      | - 0.34  | 0.74            | - 2.4        | 1.7    |
| Na (mmol/L)                                             | 0.37    | 0.24            | - 0.24       | 1.0    |
| Vitamin D (ng/mL)                                       | 0.009   | 0.93            | - 0.18       | 0.19   |
| PTH                                                     | - 0.03  | 0.13            | - 0.08       | 0.01   |
| Albumin (g/dL)                                          | 19.4    | < 0.001         | 13.0         | 25.8   |
| SPMSQ                                                   | - 3.8   | < 0.001         | - 4.4        | - 3.2  |
| ASA grading                                             | - 15.6  | < 0.001         | - 20.2       | - 11.0 |
| Handgrip strength (kg)                                  | 0.94    | < 0.001         | 0.68         | 1.2    |
| Types of fracture (PTF vs. FNF)                         | - 7.0   | 0.006           | - 12.0       | - 2.0  |
| Surgical delay (hour)                                   | - 0.001 | 0.81            | - 0.01       | 0.009  |
| Surgical classification<br>(Joint replacement vs. ORIF) | 0.29    | 0.91            | - 4.9        | 5.5    |
| Time (min)                                              | 0.001   | 0.97            | - 0.06       | 0.06   |
| Blood loss (cc)                                         | - 0.002 | 0.012           | - 0.024      | 0.02   |

Abbreviations: ASA, American Society of Anesthesiologists; BMD, bone mineral density; BMI, body mass index; CCI, Charlson Comorbidity Index; FNF, femoral neck fracture; Hb, hemoglobin; PTF, pertrochanteric fracture; ORIF, open reduction and internal fixation; SD, standard deviation.
